# Supplementary material for: Size-dependent d0 room temperature ferromagnetism in undoped In2S3 nanoparticles
Source: Royal Society of Chemistry journal article supplement (doi:10.1039/d4nj01948b), 2024-01-01
Supplement: d4nj01948b1.pdf [file d4nj01948b1.pdf]

Supplementary Information

**Size-dependent d<sup>0</sup> room temperature ferromagnetism in undoped  
In<sub>2</sub>S<sub>3</sub> nanoparticles**

*Yi Liu<sup>a,\*</sup> and Liyong Du<sup>b</sup>*

<sup>a</sup>School of Physics and Optoelectronic Engineering, Hainan University, Haikou  
570228, People's Republic of China.

<sup>b</sup>Department of Materials and Chemical Engineering, Taiyuan University, Taiyuan  
030032, People's Republic of China.

\*E-mail address: liuyi@hainanu.edu.cn

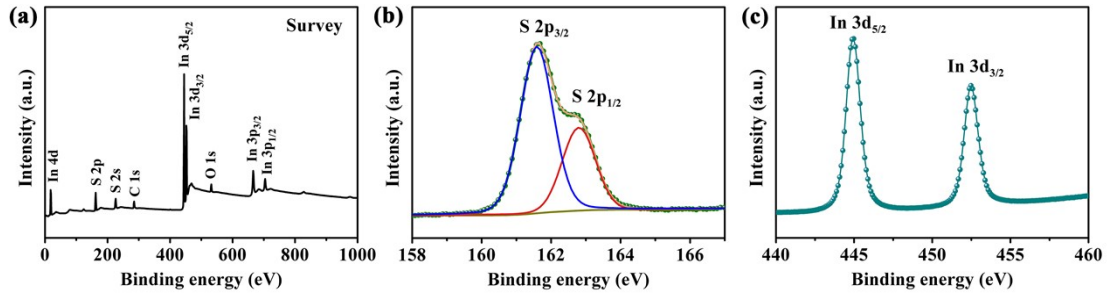

Fig. S1 XPS spectra of the sample S2: (a) survey scan, (b) high-resolution spectrum for S 2p, (c) high-resolution spectrum for In 3d.

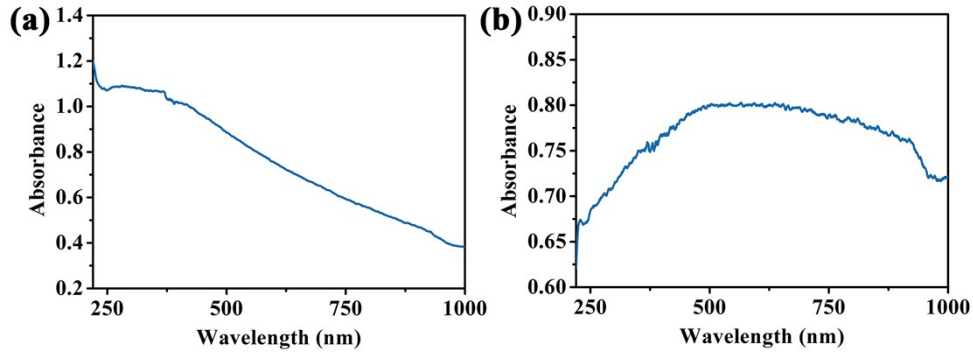

Fig. S2 The absorption spectra of samples (a) S1 and (b) S2.

The absorption spectrum of the sample S1 shows a step-like shape, which is attributed to the valence-to-conduction band transition and is consistent with the previously published studies.<sup>1, 2</sup> There is a significant blue shifted compared with bulk  $\text{In}_2\text{S}_3$  ( $\lambda_{\text{max}}=601 \text{ nm}$ ,  $E_g=2.07 \text{ eV}$ ), which can be ascertained the quantum confinement effect.<sup>3</sup> The sample S2 displays weaker light absorption ability than the sample S1.

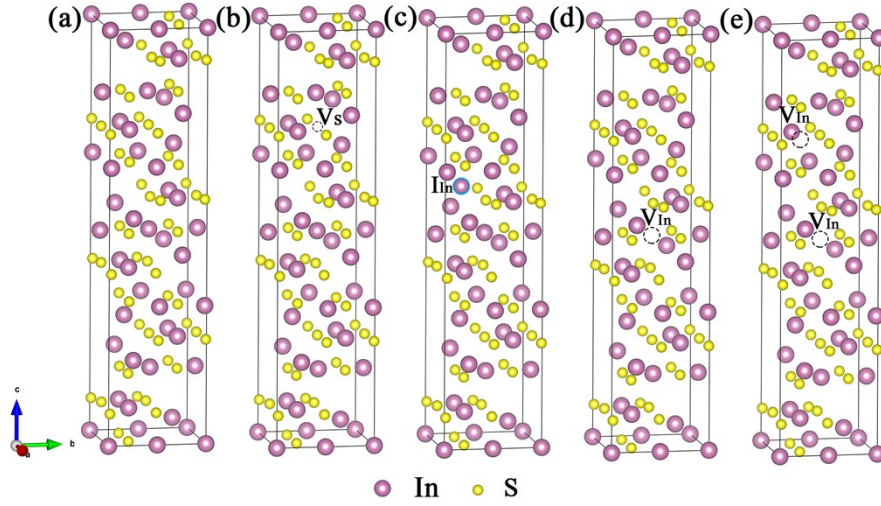

Fig. S3 Five calculation configurations: (a) an ideal system with no defects ( $\text{In}_{32}\text{S}_{48}$ ), (b) a system with one S vacancy ( $\text{In}_{32}\text{S}_{47}$ ), (c) a system with one In interstitial ( $\text{In}_{33}\text{S}_{48}$ ), (d) a system with one In vacancy ( $\text{In}_{31}\text{S}_{48}$ ), (e) a system with two In vacancies ( $\text{In}_{30}\text{S}_{48}$ ).

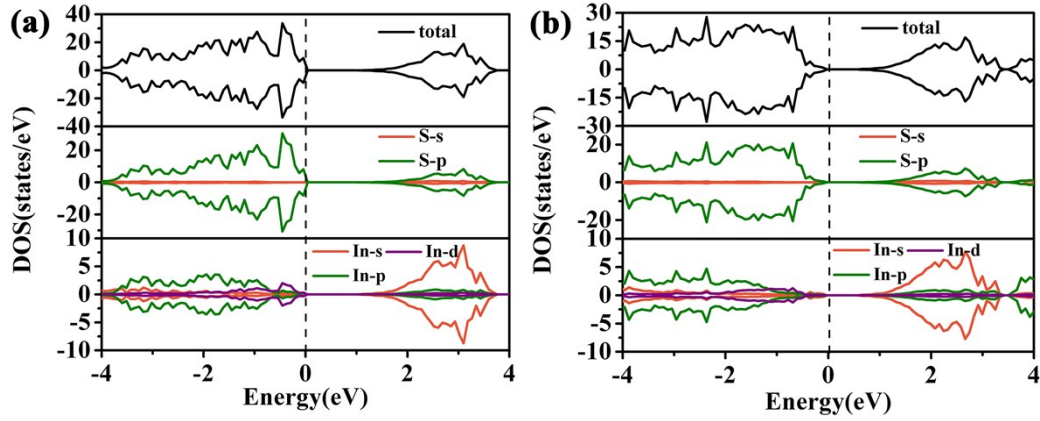

Fig. S4 TDOS and PDOS of (a)  $\text{In}_{32}\text{S}_{48}$  and (b)  $\text{In}_{32}\text{S}_{47}$  configurations. The Fermi energy levels are indicated by black dashed lines.

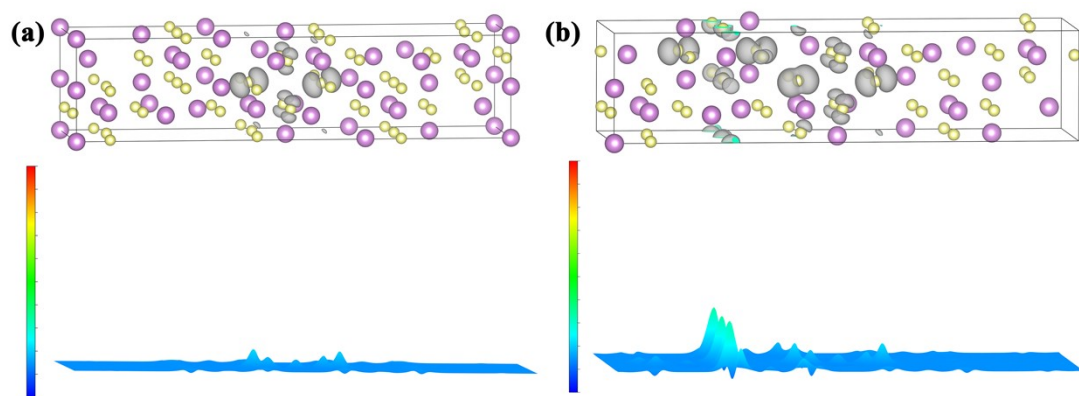

Fig. S5 Spin-density distribution and spin-density map of (a)  $\text{In}_{31}\text{S}_{48}$  and (b)  $\text{In}_{30}\text{S}_{48}$  models.

#### References

1. K. H. Park, K. Jang and S. U. Son, *Angew. Chem.*, 2006, **118**, 4724-4728.
2. W. Du, J. Zhu, S. Li and X. Qian, *Cryst. Growth Des.*, 2008, **8**, 2130-2136.
3. S. K. Batabyal, S. E. Lu and J. J. Vittal, *Cryst. Growth Des.*, 2016, **16**, 2231-2238.
